# Supplementary material for: Effects of rice blast biocontrol strain Pseudomonas alcaliphila Ej2 on the endophytic microbiome and proteome of rice under salt stress
Source: Front Microbiol. 2023 Mar 7;14:1129614. doi: 10.3389/fmicb.2023.1129614 (PMC10027718; doi:10.3389/fmicb.2023.1129614)
Supplement: Supplementary Table S2 — Comparison of enriched OTUs between the control and Ej2 inoculation. [file Table_2.XLSX]

## Sheet: Sheet1
	OTUs	Phylum	Class	Order	Family	Genus
Ej2 inoculation	Otu1223	Proteobacteria	Alphaproteobacteria	Rhizobiales	Rhizobiaceae	[Rhizobium] sphaerophysae group
	Otu1252	Proteobacteria	Alphaproteobacteria	Rhizobiales	Rhizobiales Incertae Sedis	Bauldia
	Otu1263	Proteobacteria	Alphaproteobacteria	Rhizobiales	Rhizobiaceae	Mesorhizobium
	Otu1560	Proteobacteria	Alphaproteobacteria	Rhizobiales	Rhizobiaceae	Mesorhizobium
	Otu22	Bacteroidetes	Bacteroidia	Flavobacteriales	Flavobacteriaceae	Flavobacterium
	Otu2785	Proteobacteria	Alphaproteobacteria	Rhizobiales	Rhizobiales Incertae Sedis	Bauldia
	Otu3206	Proteobacteria	Gammaproteobacteria	Enterobacteriales	Enterobacteriaceae	Raoultella
	Otu4097	Proteobacteria	Gammaproteobacteria	Pseudomonadales	Pseudomonadaceae	Pseudomonas
	Otu4172	Proteobacteria	Alphaproteobacteria	Rhizobiales	Devosiaceae	Devosia
	Otu5509	Proteobacteria	Alphaproteobacteria	Rhizobiales	Rhizobiaceae	Allorhizobium-Neorhizobium-Pararhizobium-Rhizobium
	Otu5706	Actinobacteria	Actinobacteria	Micromonosporales	Micromonosporaceae	Actinoplanes
	Otu8933	Bacteroidetes	Bacteroidia	Flavobacteriales	Flavobacteriaceae	Yeosuana
	Otu8959	Bacteroidetes	Bacteroidia	Flavobacteriales	Flavobacteriaceae	Mariniflexile
Control	Otu2116	Actinobacteria	Actinobacteria	Micrococcales	Microbacteriaceae	Leucobacter
	Otu2159	Firmicutes	Bacilli	Bacillales	Bacillaceae	Bacillus
	Otu2194	Proteobacteria	Gammaproteobacteria	Pseudomonadales	Pseudomonadaceae	Pseudomonas
	Otu3738	Proteobacteria	Gammaproteobacteria	Pseudomonadales	Pseudomonadaceae	Pseudomonas
	Otu4355	Actinobacteria	Acidimicrobiia	Microtrichales	uncultured	uncultured bacterium
	Otu4593	Proteobacteria	Alphaproteobacteria	Sphingomonadales	Sphingomonadaceae	Sphingosinicella
	Otu5990	Proteobacteria	Alphaproteobacteria	Rhizobiales	Devosiaceae	Devosia
	Otu6389	Proteobacteria	Alphaproteobacteria	Rhizobiales	Hyphomicrobiaceae	uncultured bacterium
	Otu6671	Proteobacteria	Alphaproteobacteria	Sphingomonadales	Sphingomonadaceae	Sphingobium
	Otu7125	Proteobacteria	Gammaproteobacteria	Betaproteobacteriales	Rhodocyclaceae	Methyloversatilis
	Otu7139	Proteobacteria	Alphaproteobacteria	Rhizobiales	Rhizobiaceae	Allorhizobium-Neorhizobium-Pararhizobium-Rhizobium
	Otu7848	Proteobacteria	Gammaproteobacteria	Betaproteobacteriales	Burkholderiaceae	Hydrogenophaga
	Otu7922	Proteobacteria	Gammaproteobacteria	Betaproteobacteriales	Burkholderiaceae	Kerstersia
	Otu8262	Bacteroidetes	Bacteroidia	Flavobacteriales	Flavobacteriaceae	uncultured bacterium
	Otu8301	Proteobacteria	Gammaproteobacteria	Betaproteobacteriales	Burkholderiaceae	uncultured bacterium
	Otu8422	Proteobacteria	Gammaproteobacteria	Betaproteobacteriales	Burkholderiaceae	Comamonas
	Otu108	Actinobacteria	Actinobacteria	Propionibacteriales	Nocardioidaceae	Kribbella
